# Supplementary material for: Unintended Genomic Outcomes in Current and Next Generation GM Techniques: A Systematic Review
Source: MDPI journal article supplement (doi:10.3390/plants11212997), 2022-11-07
Supplement: s1 [file s1]

## Online Resource 3

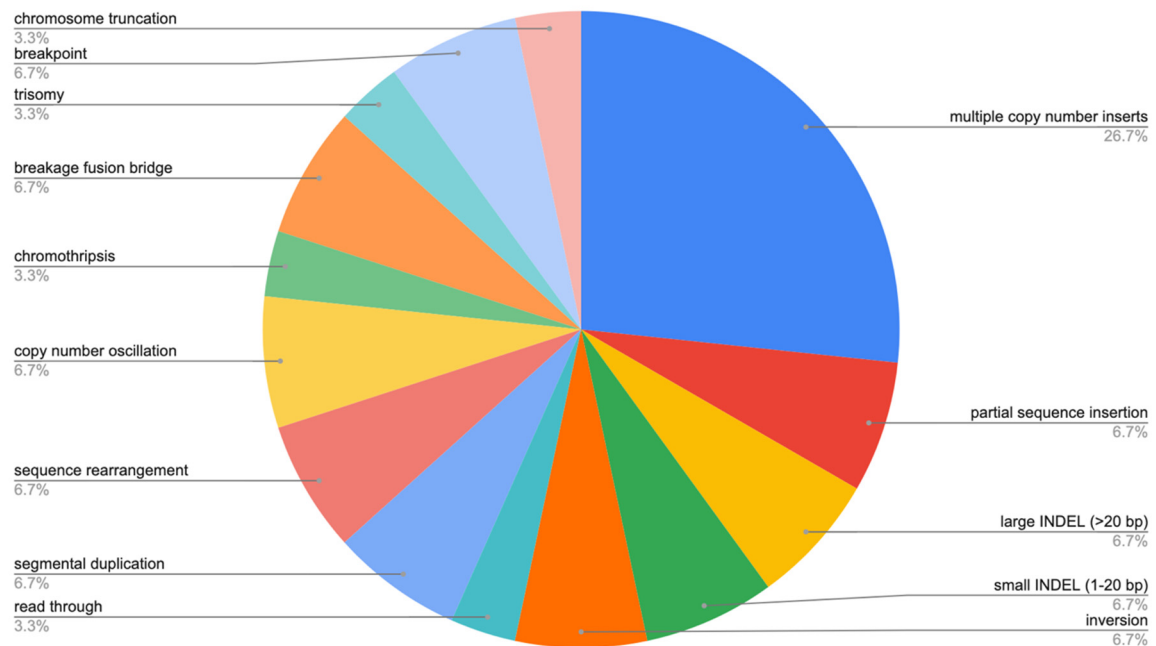

Figure S1. Genomic outcomes from Biolistic bombardment

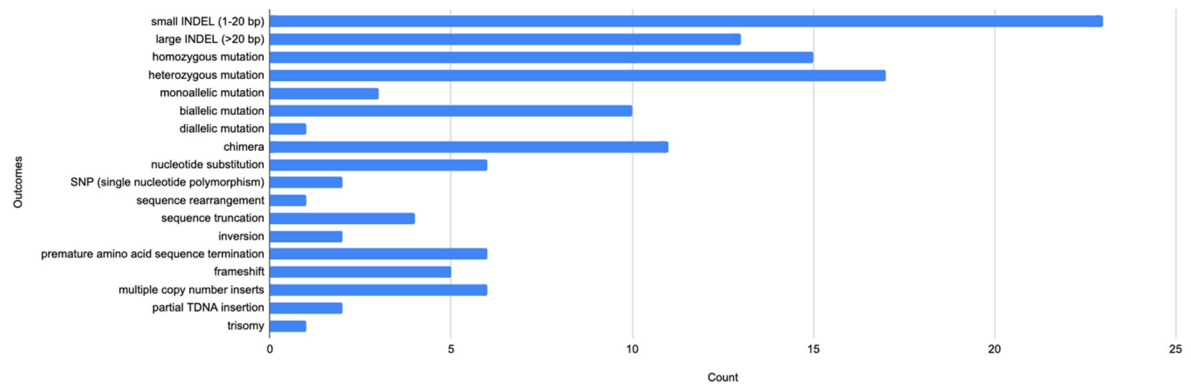

Figure S2. Genomic outcomes from CRISPR-Cas9 via *Agrobacterium*

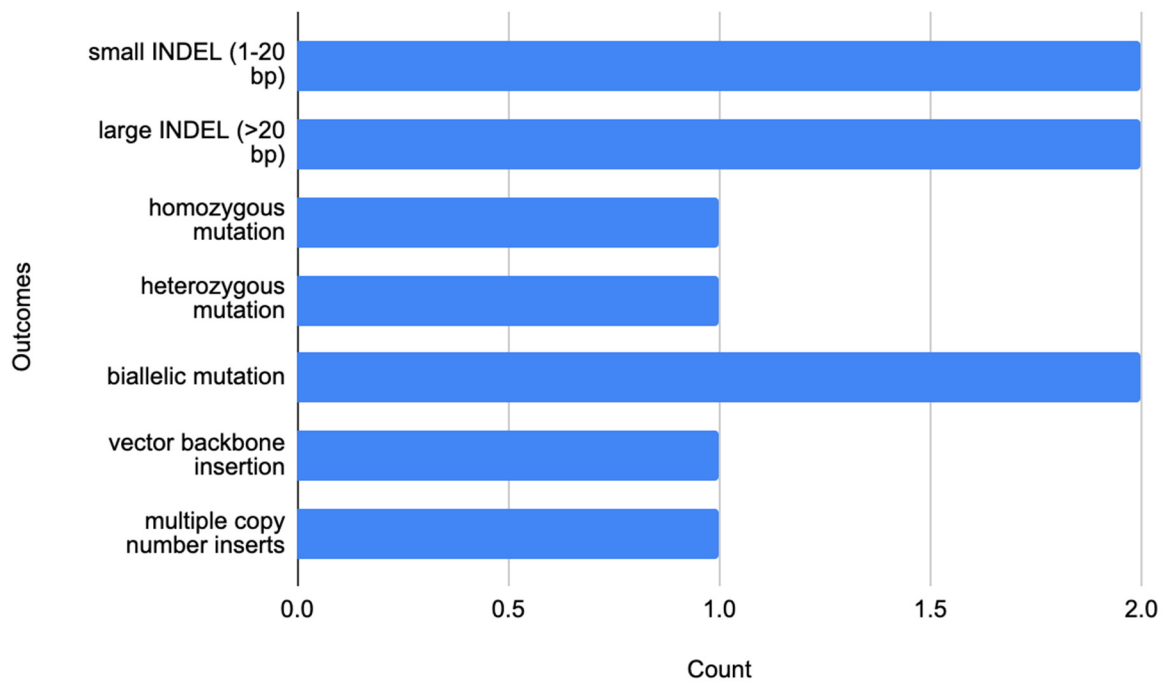

Figure S3. Genomic outcomes from CRISPR-Cas9 delivered via biolistic bombardment

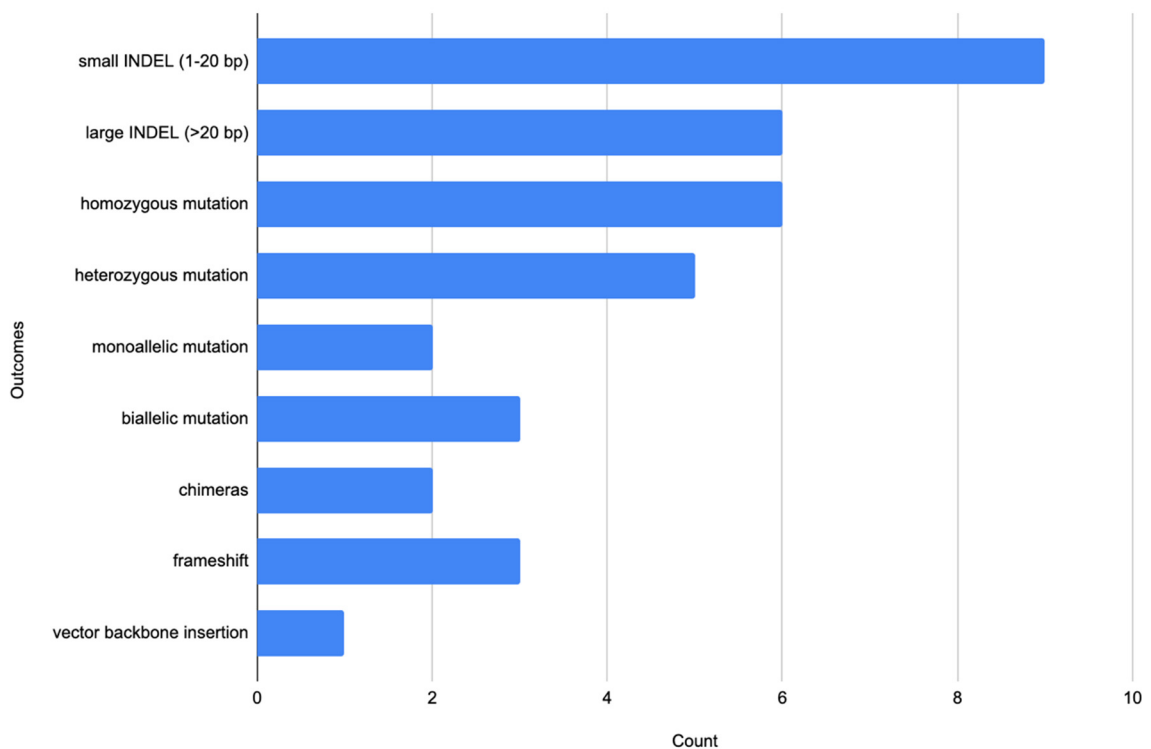

Figure S4. Genomic outcomes from CRISPR-Cas9 delivered as RNPs. The vector backbone insertion came from a paper that performed RNP/plasmid DNA co-delivery.
